# Supplementary material for: A mechanism for the activation of the mechanosensitive Piezo1 channel by the small molecule Yoda1
Source: PubMed Central journal article supplement (PMC6776524; doi:10.1038/s41467-019-12501-1), 2019-10-03
Supplement: 41467_2019_12501_MOESM8_ESM.pdf [file 41467_2019_12501_MOESM8_ESM.pdf]

**Title: Supplementary Movie 1: Sampling of Piezo1 by Yoda1 ligands.**

**Description:** Multi-ligand trajectory (top view, 0 to 4.8  $\mu$ s, sampled every 24 ns) showing protein backbone in white surface, phosphate groups as dots and each Yoda1 ligand (Van der Waals representation) in a unique color.

**Title: Supplementary Movie 2: Activation of the R2135A mutant with Yoda1.**

**Description:**  $\Delta$ PZ1 cells co-expressing GCaMP6m and the R2135A mutant were imaged for one minute at 1 frame/sec under epifluorescence illumination. 100 $\mu$ M Yoda1 was added at  $t = 10$ s. The images are displayed at 1 frame  $s^{-1}$ .

**Title: Supplementary Movie 3: Stretch-induced Piezo1 motions, side view.**

**Description:** Multi-ligand trajectory (side view, 0 to 6.9  $\mu$ s, sampled every 24 ns) showing protein backbone (new cartoon, silver), phosphate groups (yellow spheres) and the L13 ligand (blue, Van der Waals representation).

**Title: Supplementary Movie 4: Stretch-induced Piezo1 motions, top view.**

**Description:** Multi-ligand trajectory (top view, 0 to 6.9  $\mu$ s, sampled every 24 ns) showing protein backbone (new cartoon, silver), phosphate groups (yellow spheres) and the L13 ligand (blue, Van der Waals representation).

**Title: Supplementary Movie 5: Tilt motion of Piezo1 arms.**

**Description:** Projection of the top 3 principal component modes clustered using the HDBSCAN method. The centers of each cluster were then computed and exported in pdb format for visualization.
